# Supplementary material for: Inflammatory bowel disease negatively impacts household and family life
Source: PubMed Central journal article supplement — Frontline Gastroenterol. 2021 Nov 26;13(5):402–8. doi: 10.1136/flgastro-2021-102027 (PMC9380757; doi:10.1136/flgastro-2021-102027), 2021-11-26
Supplement: flgastro-2021-102027supp001.pdf [file flgastro-2021-102027supp001.pdf]

Supplementary Material, Table 1. The influence of IBD on the desire to have children in parents and/or patients with the desire for a child, and their concerns.

| <b>IBD influence on plans to have children</b>                                          | n (%)     |
|-----------------------------------------------------------------------------------------|-----------|
| Less children than initially planned or desired due to IBD <sup>a</sup> , n=38          | 25 (65.8) |
| Postponed parenthood due to IBD <sup>b</sup> , n=59                                     | 16 (27.1) |
| <b>Concerns<sup>c</sup></b>                                                             |           |
| Concerns for worsening my disease due to pregnancy                                      | 15 (25.4) |
| Concern for the possibility of genetically passing IBD to my child                      | 13 (22.0) |
| Concerns for a possible negative effect of my IBD medication on the foetus              | 10 (16.9) |
| Concern for an inability to have a baby due to decreased fertility due to IBD           | 9 (15.3)  |
| Concerns for a possible negative effect of my IBD medication on the course of pregnancy | 8 (13.6)  |
| Concerns for not being able to care for a child due to IBD.                             | 7 (11.9)  |

a. Percentage based on the 38 participants with children, b. Percentage based on the 59 participants with children and/or a desire to have or care for a child, c. The most common answers for concerns given by the participants who already had children or considered to have children, n = 59.
