# Supplementary figures and images for: Inflammatory bowel disease negatively impacts household and family life
Source: PubMed Central journal article supplement — Frontline Gastroenterol. 2021 Nov 26;13(5):402–8. doi: 10.1136/flgastro-2021-102027 (PMC9380757; doi:10.1136/flgastro-2021-102027), 2021-11-26

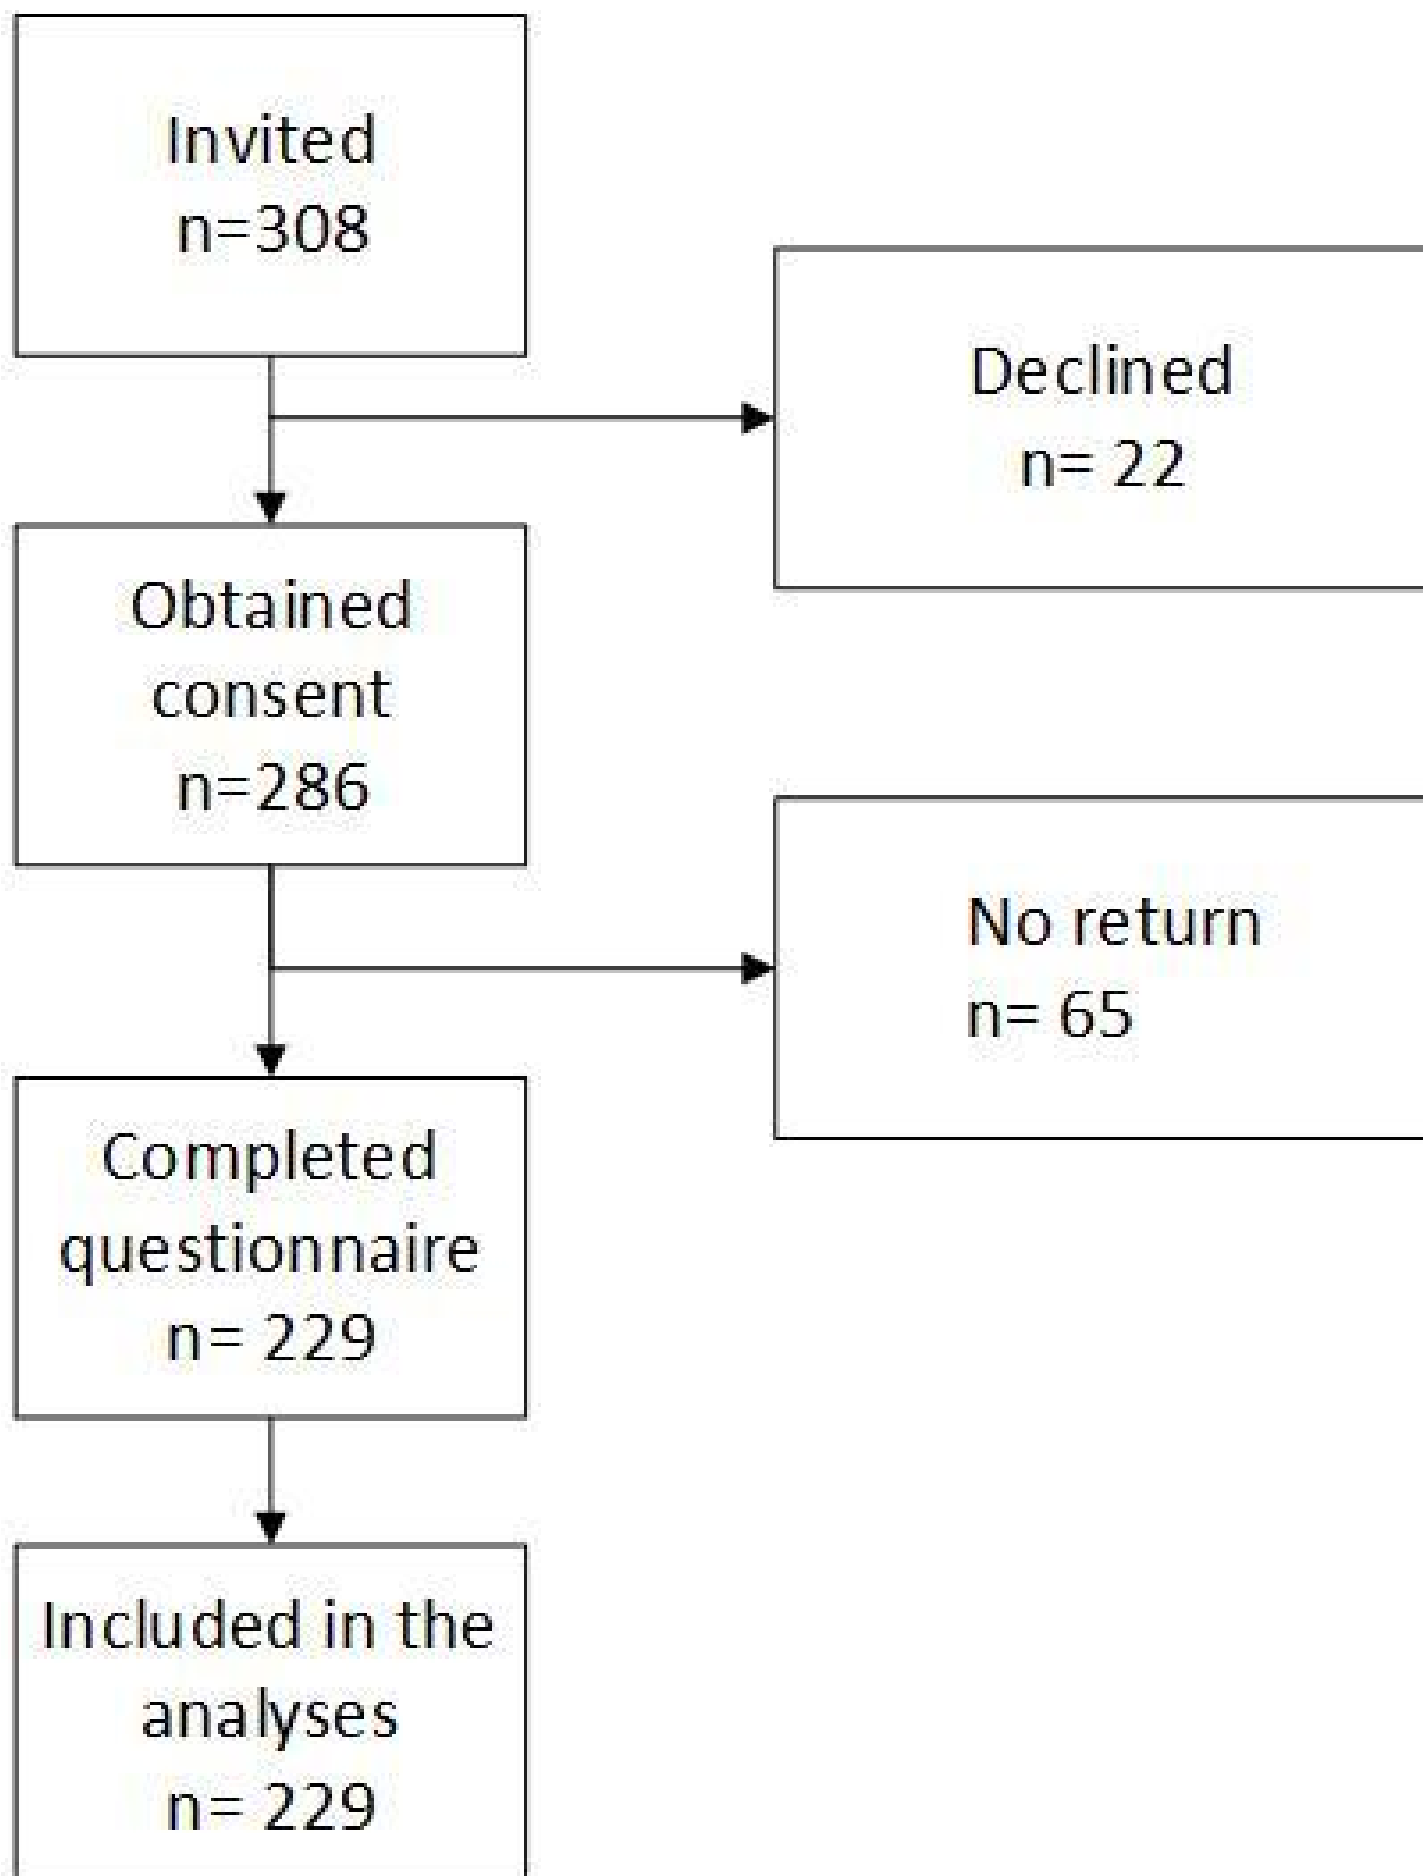

Supplement: flgastro-2021-102027supp002.pdf [file flgastro-2021-102027supp002.pdf]
